1 **Knowledge, attitude, practice and perception regarding COVID-19 among students in**  
2 **Bangladesh: Survey in Rajshahi University**

3 **Authors:**

4 <sup>1</sup>Md. Abdul Wadood, E-mail: [nazibw@gmail.com](mailto:nazibw@gmail.com)

5 <sup>2</sup>ASMA Mamun, E-mail: [mithun\\_stat@yahoo.com](mailto:mithun_stat@yahoo.com)

6 <sup>3</sup>Md. Abdur Rafi, E-mail: [abdurrafi007@gmail.com](mailto:abdurrafi007@gmail.com)

7 <sup>2</sup>Md kamrul Islam, E-mail : [kiron94ru@gmail.com](mailto:kiron94ru@gmail.com)

8 <sup>4</sup>Suhaili Mohd, E-mail: [suhailimohd@ummc.edu.my](mailto:suhailimohd@ummc.edu.my)

9 <sup>4</sup>Lai Lee Lee, E-mail : [laill@um.edu.my](mailto:laill@um.edu.my)

10 <sup>2</sup>Md. Golam Hossain, E-mail: [hossain95@yahoo.com](mailto:hossain95@yahoo.com)

11 **Affiliations**

12 <sup>1</sup>Medical Centre, University of Rajshahi, Rajshahi- 6205, Bangladesh

13 <sup>2</sup>Health Research Group, Department of Statistics, University of Rajshahi, Rajshahi-6205,  
14 Bangladesh

15 <sup>3</sup>Rajshahi Medical College, Rajshahi-6100, Bangladesh

16 <sup>4</sup>Department of Orthopaedic Surgery (NOCERAL), Faculty of Medicine, University of Malaya,  
17 50603 Kuala Lumpur, Malaysia

18

19 **Short title:** Knowledge, attitude, practice and perception of students regarding COVID-19

20 **Corresponding Author:**

21 Md. Golam Hossain

22 Professor, Health Research Group

23 Department of Statistics, University of Rajshahi

24 Rajshahi-6205, Bangladesh

25 Email: [hossain95@yahoo.com](mailto:hossain95@yahoo.com)

26 Telephone: +880721750597

27

28

29

## 30 **Abstract**

31 **Background:** The number of infection and death by COVID-19 has been rapidly increasing  
32 since December 2019 in all over the world. Until now, there is no specific treatment or vaccine  
33 for this disease; WHO suggests only some protective measures like maintaining social distance,  
34 staying home, washing hands with soap or sanitizer, wearing mask etc. The objective of this  
35 study was to survey knowledge, attitude, practice and perception regarding COVID-19 among  
36 students in Rajshahi University, Bangladesh.

37 **Methods:** We collected data from 305 students of Rajshahi University for this cross-  
38 sectional study using mixed sampling from March 11 to March 19, 2020. Frequency distribution,  
39 Mann-Whitney and Kruskal-Wallis tests were used in this study.

40 **Results:** Out of 305 participants, 224 (73.4%) and 81 (26.6%) were male and female students  
41 respectively. The study revealed that Rajshahi university students had average knowledge on  
42 symptoms, protective way and transmission of COVID-19. Female students were more  
43 knowledgeable than male. More than one third of the students had negative attitude to avoiding  
44 public transport and going out to public places with friends and family. The practice of students  
45 practice during our data collection period and in future was not satisfactory. More than one third  
46 of students were not keen to stay at home and avoid going to crowded places. The perception  
47 towards COVID-19 was not good; they had no idea whether the outbreak would affect their daily  
48 routine, study and financial matters, study field work and restrict leisure time of meeting family  
49 and relatives.

50 **Conclusions:** We found that general knowledge, attitude, practice and perception of the  
51 university students regarding COVID-19 were not satisfactory. This indicated that the situation  
52 was worse among common people. In Bangladesh, the number of healthcare providers is  
53 insufficient. University students can be employed as potential workforce to create awareness  
54 among mass people on prevention of COVID-19.

55 **Keywords:** University students, Knowledge, Attitude, Practice, Perception, COVID-19,  
56 Bangladesh

57

## 58 **Introduction**

59 Novel coronavirus disease 2019 (COVID-19) has appeared as one of the most severe pandemic  
60 and fatal disease in human history. It has already affected millions of people, thousands of whom  
61 are dying every day creating panic and a global deadlock in all spheres of life. The health  
62 authorities in Wuhan City of China found 27 pneumonia cases of unknown etiology on 31  
63 December, 2019, and Wuhan's Huanan Seafood Wholesale Market was detected as the source of  
64 the infection [1] that turned into an outbreak. On January 9, 2020, the China Government  
65 reported that the causative agent of the outbreak was 'severe acute respiratory syndrome  
66 coronavirus 2 (SARS-CoV-2)'. The World Health Organization (WHO) named the virus '2019  
67 novel coronavirus' (2019NCoV) and termed the disease 'COVID-19' [2]. Later, WHO declared  
68 the outbreak a Public Health Emergency of International Concern [3]. The Chinese Center for  
69 Disease Control and Prevention reported that the fatality rate of diagnosed cases was 2.3%, with  
70 an increasing risk in the subjects aged 60 and older (3.6% in subjects 60-69 years old; 8% in  
71 subjects 70-79 years old; and 14.8% in subjects aged 80 and older), and those with comorbidities  
72 (case fatality rate in healthy subjects was 0.9%) [4]. According to the Corona Virus Resource  
73 Centre of John Hopkins University and Medicine, 1,498,833 people were confirmed to contract  
74 the 2019NCoV by April 9, 2020 in 184 countries and out of them, 89,435 people died [5]. The  
75 scenario is changing every day with increase in number of infection and death.

76 Evidences show that mammals and birds are the reservoirs of 2019NCoV [6-7]. In Wuhan, the  
77 virus attacked only those people who visited the wet animal market and their contacts [8-9]  
78 indicating that person-to-person transmission is the likely route for spread of 2019NCoV. The  
79 virus spreads primarily through droplets of saliva or discharge from the nose of an infected

80 person when she/he coughs or sneezes [10]. WHO reports that the best way to prevent and slow  
81 down the transmission of 2019NCV is to be well informed about it, the disease it causes, and  
82 mode of its transmission, and suggests people to wash hands with soap or use hand sanitizers  
83 frequently, avoid touching the face, mouth, nose and eyes with unwashed or non-sanitized hands,  
84 maintaining social distance, and staying home to remain protected from the infection [10].  
85 Individuals should also practice respiratory etiquette such as coughing and sneezing into a flexed  
86 elbow, cover mouth and nose with handkerchief or tissue paper and wearing masks to avoid  
87 spreading of the virus [10]. Touching surfaces contaminated with the virus is also a way of  
88 spread of 2019NCV that may survive on surfaces for several hours and days [11]. Till now, there  
89 is no specific vaccine or medicinal treatment for COVID-19 [10]. The disease is manifested by  
90 fever, sore throat and mild to moderate respiratory problems and most cases are cured without  
91 any special treatment [10]. It may get severe and life-threatening in people of older age and with  
92 comorbidities like cardiovascular disease, hypertension, diabetes, chronic respiratory disease,  
93 and cancer [10]. Though the outbreak of COVID-19 is a very recent occurrence, many studies  
94 have already been done on it. But, to the best of our knowledge, no study has yet been conducted  
95 on it with Bangladeshi population. In Bangladesh, COVID-19 situation is aggravating day by  
96 day. As of April 9, 2020, a total of 218 confirmed cases of COVID-19 were detected and 20 of  
97 them died [12]. This might be an underestimate, as the facilities of 2019NCV test are very  
98 limited here. Bangladesh is an over-populated country with a population density of 976/sq.km.  
99 [13], where most of its people do not maintain proper personal hygiene. The situation may turn  
100 very serious here. The government and the concerned non-government authorities have taken  
101 many measures, though too late and insufficient, to contain the outbreak. Educational  
102 institutions, offices and markets have been closed, and the whole country has been put under

103 lock-down for more than two weeks. The government, non-government, social and professional  
104 organizations as well as the print and electronic media of the country is conducting massive  
105 publicity on mode of transmission of the virus, and sign-symptoms and measures of prevention,  
106 control and treatment of COVID-19. However, there are media observations that a considerable  
107 number of people are not following the suggestions properly. It is evidenced from previous  
108 pandemics that lack of proper knowledge about the disease is associated with negative emotion  
109 among people which can further complicate the attempts of preventing the spread of the disease  
110 [14]. Taking the perspective into our consideration, we aimed to assess knowledge, attitude,  
111 practice and perception regarding COVID-19 among the students of Rajshahi University who are  
112 assets of the nation, and thought to be more knowledgeable and conscious about contemporary  
113 happenings in home and abroad.

## 114 **Material and Methods**

### 115 **Materials**

116 This cross-sectional study was conducted from March 11 to March 19, 2020. Rajshahi University  
117 was considered as the target area, and all its students were selected as population for the study.  
118 Rajshahi University is the second largest university of Bangladesh with an approximate number  
119 of 38,300 students who come here from all over the country for higher education. Our study  
120 population comprised of non-medical students.

### 121 **Methods**

122 **Questionnaire:** We developed a questionnaire following the instructions and guidelines of  
123 WHO that had five parts: (i) general information of students, (ii) knowledge on COVID-19; it  
124 was subdivided into three portions: (a) knowledge on signs and symptoms of COVID-19, (b)

125 knowledge on the protective ways to prevent COVID-19, (c) knowledge on COVID  
126 transmission, (iii) perception about COVID-19; it was subdivided into two portions: (a)  
127 perception towards COVID-19, and (b) perception about the impact of COVID-19, (iv) attitude  
128 towards COVID-19, and (v) practice regarding COVID-19. The draft questionnaire was sent to  
129 some experts and finally it was revised following the experts' opinions and suggestions. We  
130 could not conduct pilot study for post-testing of this questionnaire for shortage of time.

131 **Sample size determination:** The population size was known (34,300). In such case, the  
132 following formula would be appropriate to calculate the required sample for this study:

133 
$$n = \frac{N}{1 + Nd^2}$$
, where n = required sample size, N= population size, and d= margin of error (we

134 have considered d= 0.05) [15]. The formula provided that 396 samples would be sufficient for  
135 this study.

136 **Sampling and data collection:** Mixed sampling was utilized in this study for selecting our  
137 required samples. In the first step, we selected three departments from 58 departments using  
138 random sampling (by lottery); the departments were: (i) Statistics, (ii) Mathematics and (iii)  
139 Physics. In the second step, one academic year was selected randomly from each selected  
140 department; these were: (i) second year from Statistics, (ii) first year from Mathematics, and (iii)  
141 first year from Physics. In the third step, cluster sampling was used for collecting information  
142 from the students of the selected years of the selected departments. Students were taken to a  
143 particular class room and briefed about the objectives of the study. Written consents of the  
144 agreed students were taken. They were abandoned from using their cell phones, laptops and  
145 internet. They filled up the questionnaire in presence of the researchers without discussion with  
146 their friends. A total number of 305 students were interviewed using this procedure. We could

147 interview no more students as the university was closed for COVID-19 outbreak in the country.

148 We decided to complete the study with data from 305 students.

149 **Ethics statement:** Prior to collecting data, we took ethical clearance from the Ethical  
150 Committee, Institute of Biological Sciences (IBSc), Rajshahi University, Bangladesh to study on  
151 communicable diseases.

152 **Statistical analysis:** All collected data were entered into SPSS (IBM, version 21) for  
153 analysis. Level of students' knowledge on COVID-19, and percentage of their perception,  
154 attitude and practice based on the selected questions were determined by frequency distribution.  
155 The normality of the data was checked by Kolmogorov-Smirnov test. The histogram, the test and  
156 graph demonstrated that our data were not normally distributed. We used Mann-Whitney and  
157 Kruskal-Wallis (nonparametric) tests to find the significance of difference in number of correct  
158 answers between two and more than two groups respectively. Statistical significance was  
159 accepted at  $p < 0.05$ .

160

## 161 **Results**

162 Of 305 samples, 73.4% were male and 26.6% were female students. Their age ranged from 17 to  
163 28 years with mean and median ages of  $20.66 \pm 1.78$  and 20 years respectively. More than half of  
164 the students (51.1%) came from rural area. Near about 50% fathers and 25.6% mothers of the  
165 students were highly educated. 76.1% students came from nuclear family (Table 3).

166 91.8% students answered that fever was a symptom of COVID-19 followed by dry cough  
167 (81.3%), difficulty in breathing (78.4%), a general feeling of unwell (77.7%), short of breath  
168 (70.8%), headache (55.1%), running nose (54.8%), sore throat (49.8%) and diarrhea (16.4%).



169 More than 43% reported that chest pain was also a symptom of COVID-19 (Table 2). 97.7%  
 170 students believed that hand washing with soaps and water could prevent COVID-19 followed by  
 171 avoidance of touching nose, mouth and eyes with unwashed hands, covering mouth and nose  
 172 with tissue or handkerchief during coughing or sneezing, wearing clean surgical mask when  
 173 attacked of respiratory illness (coughing, sneezing and flu), avoiding contact with people having  
 174 respiratory illness symptoms such as coughing, sneezing and flu, cleaning and disinfecting  
 175 objects and surface, and always eating fully cooked eggs and meat. Some students had wrong  
 176 concepts also. 39.7% students believed that eating rice and vegetables could give protection from  
 177 COVID-19, and another 16.1% students felt no need of maintaining distance from infected  
 178 persons for protection from COVID-19 (Table 1). 97% students answered that COVID-19 could  
 179 spread from person to person through coughing or sneezing, from animal to human, through  
 180 objects contaminated with the virus, and eating not properly handled and cooked wild animal  
 181 meat and food. More than 84% students had wrong concept that COVID-19 could transmit  
 182 through touching persons with flu. 52.5% and 10.8% students believed that COVID-19 could  
 183 spread through water and food, and mosquito bite respectively (Table 1).

184 **Table 1:** General knowledge on COVID-19

| <b>What are the signs and symptoms of COVID-19?</b> |            |            |                   |
|-----------------------------------------------------|------------|------------|-------------------|
|                                                     | Yes, N (%) | No, N (%)  | Don't know, N (%) |
| A general feeling of unwell                         | 237 (77.7) | 46 (15.1)  | 22 (7.2)          |
| Fever                                               | 280 (91.8) | 22 (7.2)   | 3 (1.0)           |
| Dry cough                                           | 248 (81.3) | 44 (14.4)  | 13 (4.3)          |
| Sore throat                                         | 152 (49.8) | 93 (30.5)  | 60 (19.7)         |
| Short of breath                                     | 216 (70.8) | 57 (18.7)  | 32 (10.5)         |
| Difficulty in breathing                             | 239 (78.4) | 44 (14.4)  | 22 (7.2)          |
| Headache                                            | 168 (55.1) | 95 (31.1)  | 42 (13.8)         |
| Running nose                                        | 167 (54.8) | 96 (31.5)  | 42 (13.8)         |
| Diarrhea                                            | 50 (16.4)  | 221 (72.5) | 34 (11.1)         |

Chest pain 134 (43.9) 129 (42.3) 42 (13.8)

---

**What is the protective way to COVID-19?**

---

|                                                                                                        |            |            |           |
|--------------------------------------------------------------------------------------------------------|------------|------------|-----------|
| Avoid contact with people who have respiratory illness symptoms such as coughing, sneezing and flu     | 266 (87.2) | 36 (11.8)  | 3 (1.0)   |
| Avoid touching nose, mouth and eyes with unwashed hands                                                | 296 (97.0) | 8 (2.6)    | 1 (0.3)   |
| Always perform hand washing with soaps and water                                                       | 298 (97.7) | 5 (1.6)    | 2 (0.7)   |
| Always eat fully cook eggs and meat                                                                    | 227 (74.4) | 62 (20.3)  | 16 (5.2)  |
| Always eat rice and vegetables                                                                         | 121 (39.7) | 146 (47.9) | 38 (12.5) |
| Clean and disinfect objects and surface                                                                | 244 (80.0) | 36 (11.8)  | 25 (8.2)  |
| Cover mouth and nose with tissue or handkerchief when cough or sneeze                                  | 286 (93.8) | 13 (4.3)   | 6 (2.0)   |
| Wear clean surgical mask when you have respiratory illness symptoms such as coughing, sneezing and flu | 280 (91.8) | 19 (6.2)   | 6 (2.0)   |
| Don't need to maintain distance from infected person                                                   | 49 (16.1)  | 248 (81.3) | 8 (2.6)   |

---

**Knowledge on COVID-19 transmission**

---

|                                                                                                               |            |            |           |
|---------------------------------------------------------------------------------------------------------------|------------|------------|-----------|
| COVID-19 can be spread from animal to human                                                                   | 240 (78.7) | 35 (11.5)  | 30 (9.8)  |
| Novel coronavirus can be spread from person to person                                                         | 296 (97.0) | 7 (2.3)    | 2 (0.7)   |
| A person can get COVID-19 through coughing or sneezing from a COVID-19 person                                 | 287 (94.1) | 11 (3.6)   | 7 (2.3)   |
| A person can get COVID-19 through mosquito bite                                                               | 33 (10.8)  | 236 (77.4) | 36 (11.8) |
| A person can get COVID-19 through water and food                                                              | 160 (52.5) | 107 (35.1) | 38 (12.5) |
| A person can get COVID-19 through objects contaminated with coronavirus                                       | 238 (78.0) | 31 (10.2)  | 36 (11.8) |
| A person can get COVID-19 by touching other person with flu viruses and then touching their own mouth or nose | 259 (84.9) | 32 (10.5)  | 14 (4.6)  |

185

186 Table 2 shows the level of knowledge on COVID-19 among university students. Only 3.9%

187 students gave correct answers of all questions regarding signs and symptoms of COVID-19,

188 while more than 46% students answered 6-7 questions correctly. About half of the students

189 (49.5%) knew the ways of prevention of COVID-19. 35.1% students had knowledge about the

190 possible ways of COVID-19 transmission.

191 **Table 2:** Level of knowledge on COVID-19 among university students

| Question                                     | Number of correct answer | Level of knowledge, N (%) | Question                                              | Number of correct answer           | Level of knowledge, N (%) |
|----------------------------------------------|--------------------------|---------------------------|-------------------------------------------------------|------------------------------------|---------------------------|
| What are the signs and symptoms of Covid-19? | 0                        | 3 (1.0)                   | What is the protective way to avoid COVID infections? | 2                                  | 2 (0.3)                   |
|                                              | 1                        | 5 (1.6)                   |                                                       | 3                                  | 5 (1.6)                   |
|                                              | 2                        | 7 (2.3)                   |                                                       | 4                                  | 14 (4.6)                  |
|                                              | 3                        | 13 (4.3)                  |                                                       | 5                                  | 37 (12.1)                 |
|                                              | 4                        | 36 (11.8)                 |                                                       | 6                                  | 97 (31.8)                 |
|                                              | 5                        | 53 (17.4)                 |                                                       | 7                                  | 151 (49.5)                |
|                                              | 6                        | 82 (26.9)                 |                                                       | Knowledge on COVID-19 transmission | 1                         |
|                                              | 7                        | 62 (20.3)                 | 2                                                     |                                    | 6 (2.0)                   |
|                                              | 8                        | 32 (10.5)                 | 3                                                     |                                    | 31 (10.2)                 |
|                                              | 9                        | 12 (3.9)                  |                                                       | 4                                  | 56 (18.4)                 |
|                                              |                          |                           |                                                       | 5                                  | 104 (34.1)                |
|                                              |                          |                           |                                                       | 6                                  | 107 (35.1)                |

192  
 193 The average number of 5.76±1.76 questions on signs and symptoms, 6.22±0.98 questions on  
 194 protective way to avoid COVID-19 and 4.89±1.08 questions on transmission of COVID-19 were  
 195 correctly answered by the participants. Mann-Whitney test demonstrated that female students  
 196 gave significantly more correct answers to the questions regarding protective way to avoid and  
 197 transmission of COVID-19 than male students (p<0.05). No significant difference was observed  
 198 between urban and rural, nuclear and joint family, and among parent's education levels regarding  
 199 knowledge on COVID-19 (Table 3).

200 **Table 3:** Average knowledge on symptoms, protective way and transmission of COVID-19 by  
 201 different characteristics of participants

| Characteristics           | Sings and symptoms, Mean±SD, 5.76±1.76 | Protective way to avoid COVID-19, Mean±SD, 6.22±0.98 | Knowledge on transmission, Mean±SD, 4.89±1.08 |
|---------------------------|----------------------------------------|------------------------------------------------------|-----------------------------------------------|
| <b>Gender</b>             | M-W test value=8173 <sup>n</sup>       | M-W test value=7587 <sup>*</sup>                     | M-W test value=7534 <sup>*</sup>              |
| Male, 224(73.4)           | 5.68±1.79                              | 6.11±1.05                                            | 4.80±1.11                                     |
| Female, 81(26.6)          | 5.99±1.66                              | 6.48±0.67                                            | 5.14±0.96                                     |
| <b>Original residence</b> | M-W test value=11070 <sup>n</sup>      | M-W test value=11128 <sup>n</sup>                    | M-W test value=11570 <sup>n</sup>             |

|                           |                                                     |                                                     |                                                     |
|---------------------------|-----------------------------------------------------|-----------------------------------------------------|-----------------------------------------------------|
| Urban, 149(48.9)          | 5.69±1.75                                           | 6.25±0.98                                           | 4.91±1.01                                           |
| Rural, 156(51.1)          | 5.83±1.77                                           | 6.19±0.98                                           | 4.87±1.15                                           |
| <b>Type of family</b>     | M-W test<br>value=79430 <sup>n</sup>                | M-W test<br>value=8283 <sup>n</sup>                 | M-W test<br>value=0.948 <sup>n</sup>                |
| Nuclear, 232(76.1)        | 5.79±1.77                                           | 6.20±1.00                                           | 4.89±1.07                                           |
| Joint,<br>73(23.9)        | 5.67±1.72                                           | 6.27±0.90                                           | 4.89±1.11                                           |
| <b>Fathers' education</b> | K-W test,<br>Chi-square<br>value=1.074 <sup>n</sup> | K-W test,<br>Chi-square<br>value=1.712 <sup>n</sup> | K-W test,<br>Chi-square<br>value=5.372 <sup>n</sup> |
| Uneducated, 25(8.2)       | 5.28±2.23                                           | 6.12±0.93                                           | 5.28±0.79                                           |
| Primary, 48(15.7)         | 5.79±1.69                                           | 6.08±1.15                                           | 4.71±1.11                                           |
| Secondary, 86(28.2)       | 5.92±1.69                                           | 6.28±0.99                                           | 4.80±1.09                                           |
| Higher, 146(47.9)         | 5.74±1.73                                           | 6.25±0.92                                           | 4.94±1.09                                           |
| <b>Mothers' education</b> | K-W test,<br>Chi-square<br>value=3.704 <sup>n</sup> | K-W test,<br>Chi-square<br>value=0.832 <sup>n</sup> | K-W test,<br>Chi-square<br>value=3.228 <sup>n</sup> |
| Uneducated, 36(11.8)      | 5.22±2.14                                           | 6.17±0.91                                           | 4.83±1.06                                           |
| Primary, 65(21.3)         | 5.94±1.60                                           | 6.18±0.97                                           | 4.69±1.16                                           |
| Secondary, 126(41.3)      | 5.87±1.76                                           | 6.22±1.00                                           | 4.95±1.09                                           |
| Higher, 78(25.6)          | 5.67±1.67                                           | 6.27±0.99                                           | 4.99±1.00                                           |

202  
203 **N.B.:** SD: Standard deviation; M-W: Mann-Whitney; K-W: Kruskal-Wallis; \*: 5% level of  
204 significance; n: non-significance.

205  
206 82.0% students were afraid to contact people with flu symptoms followed by eating wildlife  
207 animal's meat, going abroad with friends and family, eating raw food, going to crowded places,  
208 eating outside food from hawker centers, contacting friends and relatives just coming back from  
209 overseas, going out to public places with friends and family, and taking public transport. On the  
210 other hand, 41.6% and 30.5% did not like to avoid taking public transport and going out to public  
211 places with friends and family respectively (Table 4).

212 **Table 4:** Attitude toward COVID-19 among university students

| <b>Level of fearful</b>                                                                                     | <b>Yes</b> | <b>No</b> | <b>Occasionally</b> |
|-------------------------------------------------------------------------------------------------------------|------------|-----------|---------------------|
| Are you afraid to contact with people who has flu symptoms such as cough, running nose, sneezing and fever? | 250 (82.0) | 34 (11.1) | 21 (6.9)            |
| Are you afraid to eat outside food from                                                                     | 224 (73.4) | 63 (20.7) | 18 (5.9)            |

|                                                                                   |            |            |          |
|-----------------------------------------------------------------------------------|------------|------------|----------|
| hawker centers?                                                                   |            |            |          |
| Are you afraid of eating raw food?                                                | 228 (74.8) | 62 (20.3)  | 15 (4.9) |
| Are you are afraid of eating wildlife animal's meat?                              | 246 (80.7) | 46 (15.1)  | 13 (4.3) |
| Are you afraid to contact your friends and relatives who just back from overseas? | 220 (72.1) | 60 (19.7)  | 25 (8.2) |
| Are you afraid to go to crowd places?                                             | 224 (73.4) | 57 (18.7)  | 24 (7.9) |
| Are you avoiding going out to public places with friends and family?              | 183 (60.0) | 93 (30.5)  | 29 (9.5) |
| Are you avoiding going abroad with friends and family?                            | 229 (75.1) | 67 (22.0)  | 9 (3.0)  |
| Are you avoiding taking public transport (e.g taxi, bus, train and airplane)?     | 148 (48.5) | 127 (41.6) | 30 (9.8) |

213  
 214 It was observed that 89.5%, 82.3%, 66.6%, 59.7% and 53.8% students currently had or will have  
 215 the practice of washing hands frequently, performing healthy lifestyle, taking medicines if  
 216 necessary, staying home and avoiding crowded places and wearing surgical face masks while  
 217 going out in public places respectively to avoid COVID-19 attack. More than 39% students had  
 218 negative practice of not wearing surgical face masks while going out in public places, and 32.1%  
 219 and 27.2 % students will not like to practice staying at home and avoid going to crowded places  
 220 and taking medicine if they feel unwell respectively (Table 5).

221 **Table 5:** Practice toward COVID-19 among university students

| <b>Practice to avoid COVID-19</b>                                                                                                                                  | <b>Yes</b> | <b>No</b>  | <b>Occasionally</b> |
|--------------------------------------------------------------------------------------------------------------------------------------------------------------------|------------|------------|---------------------|
| Do you wash your hands frequently and thoroughly?                                                                                                                  | 273 (89.5) | 18 (5.9)   | 14 (4.6)            |
| Are you are wearing surgical face mask when out in public?                                                                                                         | 164 (53.8) | 121 (39.7) | 20 (6.6)            |
| Will you stay at home and avoid go to crowded places?                                                                                                              | 182 (59.7) | 98 (32.1)  | 25 (8.2)            |
| Will you take medicine (conventional or traditional medicine) if you feel your body unwell?                                                                        | 203 (66.6) | 83 (27.2)  | 19 (6.2)            |
| Will you perform healthy lifestyle (eat nutritious food, exercise regularly, and get enough of rest or sleep) to maintain your body health and to avoid infection? | 251 (82.3) | 32 (10.5)  | 22 (7.2)            |

222  
 223 Only 21% students showed positive attitude answering all 9 questions correctly, while 36.4%,  
 224 29.2% and 12.5% students showed positive attitude with correctly answering 7-8, 4-6 and 1-3  
 225 questions respectively. Proper practices (answering all questions correctly) were found among  
 226 24% students while 54.1% and 20.4% students provided 3-4 and 1-2 correct answers showing  
 227 their poor practice (Table 6).

228 **Table 6:** Level of positive attitude and good practice on COVID-19 among university students

| Attitude                 | Number of positive answer | Level of positive attitude, N (%) | Practice                 | Number of positive answer | Level of good practice, N (%) |
|--------------------------|---------------------------|-----------------------------------|--------------------------|---------------------------|-------------------------------|
| Attitude toward COVID-19 | 0                         | 3 (1.0)                           | Practice toward COVID-19 | 0                         | 3 (1.0)                       |
|                          | 1                         | 5 (1.6)                           |                          | 1                         | 13 (4.3)                      |
|                          | 2                         | 24 (7.9)                          |                          | 2                         | 49 (16.1)                     |
|                          | 3                         | 9 (3.0)                           |                          | 3                         | 73 (23.9)                     |
|                          | 4                         | 22 (7.2)                          |                          | 4                         | 92 (30.2)                     |
|                          | 5                         | 5 (10.5)                          |                          | 5                         | 75 (24.6)                     |
|                          | 6                         | 35 (11.5)                         |                          |                           |                               |
|                          | 7                         | 50 (16.4)                         |                          |                           |                               |
|                          | 8                         | 61 (20.0)                         |                          |                           |                               |
|                          | 9                         | 64 (21.0)                         |                          |                           |                               |

229  
 230 The average level of positive attitude and good practice among students were  $6.40 \pm 2.32$  and  
 231  $3.52 \pm 1.20$  respectively. Mann-Whitney test demonstrates that female students ( $3.86 \pm 1.16$ ) were  
 232 significantly more practicing to avoid COVID-19 than male students ( $3.39 \pm 1.19$ ) ( $p < 0.01$ ), and  
 233 students coming from rural environment ( $6.70 \pm 2.12$ ) showed more positive attitude than their  
 234 counterparts ( $6.09 \pm 2.49$ ) ( $p < 0.05$ ). Students living in nuclear family ( $3.62 \pm 1.16$ ) had more  
 235 practice to avoid COVID-19 than students coming from joint family ( $3.21 \pm 1.28$ ) ( $p < 0.05$ ). We  
 236 did not find the significance of difference in attitude and practice between other groups (Table  
 237 7).

238 **Table 7:** Positive attitude and good practice of COVID-19 by different characteristics of  
 239 participants

240

| <b>Characteristics</b>    | <b>Attitude , Mean±SD, 6.40±2.32</b>         | <b>Practice, Mean±SD, 3.52±1.20</b>           |
|---------------------------|----------------------------------------------|-----------------------------------------------|
| <b>Gender</b>             | M-W test value=8015 <sup>n</sup>             | M-W test value=6964 <sup>**</sup>             |
| Male, 224(73.4)           | 6.33 ±2.21                                   | 3.39±1.19                                     |
| Female, 81(26.6)          | 6.58±2.62                                    | 3.86±1.16                                     |
| <b>Original residence</b> | M-W test value=10110 <sup>*</sup>            | M-W test value=10868 <sup>n</sup>             |
| Urban, 149(48.9)          | 6.09±2.49                                    | 3.46±1.15                                     |
| Rural, 156(51.1)          | 6.70±2.12                                    | 3.57±1.25                                     |
| <b>Type of family</b>     | M-W test value=8376 <sup>n</sup>             | M-W test value=6935 <sup>*</sup>              |
| Nuclear, 232(76.1)        | 6.42±2.29                                    | 3.62±1.16                                     |
| Joint, 73(23.9)           | 6.33±2.43                                    | 3.21±1.28                                     |
| <b>Fathers' education</b> | K-W test, $\chi^2$ -value=6.607 <sup>n</sup> | K-W test, $\chi^2$ -value =5.009 <sup>n</sup> |
| Uneducated, 25(8.2)       | 7.00±1.78                                    | 3.24±1.23                                     |
| Primary, 48(15.7)         | 6.94±2.39                                    | 3.83±1.16                                     |
| Secondary, 86(28.2)       | 6.24±2.44                                    | 3.49±1.23                                     |
| Higher, 146(47.9)         | 6.21±2.28                                    | 3.48±1.19                                     |
| <b>Mothers' education</b> | K-W test, $\chi^2$ -value=3.507 <sup>n</sup> | K-W test, $\chi^2$ -value=2.758 <sup>n</sup>  |
| Uneducated, 36(11.8)      | 6.78±2.09                                    | 3.22±1.38                                     |
| Primary, 65(21.3)         | 6.65±2.43                                    | 3.68±1.17                                     |
| Secondary, 126(41.3)      | 6.38±2.19                                    | 3.52±1.21                                     |
| Higher, 78(25.6)          | 6.05±2.52                                    | 3.51±1.13                                     |

241  
 242 **N.B.:** SD: Standard deviation; M-W: Mann-Whitney; K-W: Kruskal-Wallis;  $\chi^2$ : Chi-square; \*: 5%  
 243 level of significance; \*\*: 1% level of significance; n: non-significance.

244  
 245 54.1% students felt they were highly exposed to COVID-19, while near about half of the  
 246 students thought they were not or not at all exposed. More than 36%, 30%, 27% and 6% students  
 247 were extremely, very, moderately and not at all worried about getting COVID-19 respectively.  
 248 36.4% and 27.5% students were very and moderately worried about the consequences of getting

249 COVID-19 respectively. About one-third (32.5%), 37.7% and 22.0% students were very fearful,  
 250 fearful and slightly fearful respectively of COVID-19. 23%, 27.5%, 26.6% and 23% students felt  
 251 that COVID-19 outbreak affected their daily routine with great extent, moderately, very little and  
 252 not at all respectively. Also, 23%, 17%, 22.3% and 37.7% students thought COVID-19 outbreak  
 253 affected their study with great extent, moderately, very little and not at all respectively. More  
 254 than 21%, 16%, 19% and 43% students believed that COVID-19 affected financial matters with  
 255 great extent, moderately, very little and not at all respectively. More than 29% students did not  
 256 think that COVID-19 outbreak affected their family’s daily routine, while 18%, 30.2% and  
 257 22.6% students believed that it affected their family’s daily routine with great extent, moderately  
 258 and very little respectively. About 60% students answered that COVID-19 affected their travel  
 259 abroad with great extent, while other students thought it had affected their travel abroad  
 260 moderately (17.4%), little (11.8%) or not at all (11.5%). More than 23% students did not believe  
 261 that COVID-19 affected their study field works, while more than 33% and 22% students thought  
 262 it affected their study field works with great extent and moderately respectively. Students  
 263 believed with great extent (31.1%), moderate (23%), very little (26.9%) and not at all (19%) that  
 264 COVID-19 restricted their leisure time of meeting friends. They also believed that COVID-19  
 265 outbreak restricted their leisure time of meeting family and relatives with great extent (28.9%),  
 266 moderately (23%), very little (18%) and not at all (30.2%) (Table 8).

267 **Table 8:** Perception of students toward COVID-19 and about its impact

|                                     |                          |                        |                                |                     |
|-------------------------------------|--------------------------|------------------------|--------------------------------|---------------------|
| Are you highly exposed to COVID-19? | Yes, N (%)<br>165 (54.1) | No, N (%)<br>79 (25.9) | Not at all, N (%)<br>61 (20.0) |                     |
|                                     | Extremely<br>N (%)       | Very<br>N (%)          | Moderately<br>N (%)            | Not at all<br>N (%) |



|                                                                 |                                    |                                |                                        |                                          |
|-----------------------------------------------------------------|------------------------------------|--------------------------------|----------------------------------------|------------------------------------------|
| How worried are you about getting COVID-19?                     | 110 (36.1)                         | 92 (30.2)                      | 84 (27.5)                              | 19 (6.2)                                 |
| How worried are you about the consequences of getting COVID-19? | 96 (31.5)                          | 111 (36.4)                     | 84 (27.5)                              | 14 (4.6)                                 |
| How is your fear level toward COVID-19?                         | Very fearful<br>N (%)<br>99 (32.5) | Fearful<br>N (%)<br>115 (37.7) | Slightly fearful<br>N (%)<br>67 (22.0) | Not at all fearful,<br>N (%)<br>24 (7.9) |

### Perception about the impact of COVID-19

|                                                                                    | Great extent | Moderately | Very little | Not at all |
|------------------------------------------------------------------------------------|--------------|------------|-------------|------------|
| The COVID-19 outbreak has affected my daily routine                                | 70(23.0)     | 84(27.5)   | 81(26.6)    | 70(23.0)   |
| The COVID-19 outbreak has affected my study                                        | 70(23.0)     | 52(17.0)   | 68(22.3)    | 115(37.7)  |
| The COVID-19 outbreak has affected my financial                                    | 65(21.3)     | 49(16.1)   | 60(19.7)    | 131(43.0)  |
| The COVID-19 outbreak has affected my family's daily routine                       | 55(18.0)     | 92(30.2)   | 69(22.6)    | 89(29.2)   |
| The COVID-19 outbreak has affected my travel abroad                                | 181(59.3)    | 53(17.4)   | 36(11.8)    | 35(11.5)   |
| The COVID-19 outbreak has affected my study field work                             | 102(33.4)    | 69(22.6)   | 63(20.7)    | 71(23.3)   |
| The COVID-19 outbreak has restrict my leisure time of meeting friends              | 95(31.1)     | 70(23.0)   | 82(26.9)    | 58(19.0)   |
| The COVID-19 outbreak has restrict my leisure time of meeting family and relatives | 88(28.9)     | 70(23.0)   | 55(18.0)    | 92(30.2)   |

269

## 270 Discussion

271 The outbreak of COVID-19 in China attracted attention of the whole world including  
 272 Bangladesh since its early stage. Hundreds of students, businessmen and tourists started to return  
 273 home from China creating a hue and cry in the country. Soon Bangladeshi people from many

274 other countries started to rush to the homeland. Mismanagement of health check-up, COVID-19  
275 test and 14 days quarantine of these home-coming people created a huge debate and became a  
276 hot cake for print, electronic and social media. Being comparatively more knowledgeable part of  
277 the population, the university students are supposed to have higher level of knowledge, attitude,  
278 practice and perception regarding the disease. For that purpose, data were collected from 305  
279 students of Rajshahi University. It is reported that adequate knowledge, and positive attitude and  
280 perception are related to proper practice [16]. Four types of issues related to COVID-19 were  
281 discussed in this study.

## 282 **Knowledge on COVID-19**

283 **Signs and symptoms:** This study revealed that only 3.9% and 10.5% students knew correct  
284 answers of all nine and eight questions respectively. This indicates that the students did not have  
285 good knowledge about the signs and symptoms of COVID-19. The knowledge level of our  
286 students was far below than that of Chinese people [2] and Indian healthcare professionals,  
287 students and non-medical healthcare staffs [17].

288 **Protective way to avoid COVID-19:** About 40% students thought eating rice and  
289 vegetables could prevent COVID-19. Half of the students answered all seven questions correctly.  
290 We may consider that the students had good knowledge on the protective ways of avoiding  
291 COVID-19 though the level of knowledge was lower than that among Indian healthcare  
292 professionals, students and non-medical healthcare staffs [17].

293 **Knowledge of COVID-19 transmission:** More than half of the students deemed that  
294 COVID-19 could transmit via water and food, and 10.8% students believed that mosquito was a  
295 vector of COVID-19. Only 35.1% students answered all the 6 questions correctly. It reveals that

296 the students had fair or moderate knowledge on COVID-19 transmission. However, it was lower  
297 than the knowledge level of healthcare professionals and students but higher than that among  
298 non-medical healthcare staffs of India [17]. We found that female students were more  
299 knowledgeable than males regarding transmission of COVID-19. Usually females take  
300 everything more seriously than males, and they have more curiosity to know anything than  
301 males. This might be a reason of difference of the knowledge between male and female students.  
302 Same result was observed in Chinese and Indian studies [16, 17].

### 303 **Attitude**

304 WHO suggests people to avoid public gatherings, maintain social distancing and stay home for  
305 prevention of COVID-19. This study demonstrates that more than 40% had negative attitude  
306 towards the measures. The facts reveal that the students of Rajshahi University did not have good  
307 attitude towards COVID-19. Attitude towards COVID-19 among the Chinese people and Indian  
308 healthcare professionals, students and non-medical healthcare staffs was very positive [2, 17].  
309 The students coming from rural area showed more positive attitude than urban students. It could  
310 not be compared as no similar study is available.

### 311 **Practice**

312 About 40% students were not using surgical face masks in public places. Scarcity and higher  
313 price of masks might be a reason behind it. More than one-third of students were not interested in  
314 staying home and avoiding crowds. In China, almost all people used face masks and avoided  
315 public places to prevent COVID-19 transmission [2]. Level of practice of preventive guides was  
316 also high among Indians [17]. Usually, practice of personal hygiene is comparatively poor in  
317 Bangladesh, such as, only 40% people wash hands with soap and water and only 35% schools

318 have facilities of washing hands with soap and water [17]. This might contribute to poor practice  
319 regarding prevention of COVID-19 among our respondents. The female students coming from  
320 nuclear family were more practicing to avoid COVID-19 than males and joint family's students.  
321 A Chinese study supports the finding [16].

## 322 **Perception**

323 **Perception towards COVID-19:** A considerable number of students thought that they  
324 were not exposed to COVID-19. Only a smaller part of them were moderately worried of its  
325 infection and consequences, and slightly fearful of it. On the basis of answers of the four  
326 questions of this section, we can conclude that the student's perception towards COVID-19 was  
327 not good. No previous study on this issue is available till now to compare our finding. Religious  
328 and cultural faiths and views might play role in this regard.

329 **Perception about the impact of COVID-19:** This study shows that only a smaller  
330 portion of students felt COVID-19 outbreak affected their daily routine, study, financial matters,  
331 family's daily routine, study field works, and leisure time. The respondents' perception regarding  
332 impact of COVID-19 was poor. To the best of our knowledge, there is no relevant study either in  
333 home or abroad regarding the perception about the impact or consequences of COVID-19. We  
334 think, during our data collection period, students had no idea how COVID-19 could affect their  
335 life.

336 **Limitation of this study:** Perhaps, this is the first attempt of survey on knowledge, attitude,  
337 practice and perception towards COVID-19 among university students in Bangladesh. This study  
338 searched out some alarming facts. However, we had many limitations too. The sample size was  
339 small. This cross-sectional study could not look into any change in students' knowledge, attitude,

340 practice and perception on COVID-19 in course of time. By this time, some new information  
341 was got, and new misconceptions and misinformation were publicized, but we could not consider  
342 these issues. There are many universities in Bangladesh, but we considered only Rajshahi  
343 University students as our sample due to limitation of time and budget. The limitations reveal  
344 that more in-depth studies are needed.

## 345 **Conclusions**

346 In this study, we examined the students' knowledge on signs and symptoms, preventive measure  
347 and mode of transmission of COVID-19. We found that the general knowledge of the students on  
348 our selected issues was not satisfactory. A remarkable number of students had negative attitude  
349 towards COVID-19. During the data collection time, students' practices of avoiding COVID-19  
350 were found unsatisfactory. Also, students' perception about COVID-19 was not good. We may  
351 suggest the health authorities of Bangladesh to take necessary steps for improving university  
352 students' knowledge, attitude, practice and perception towards COVID-19. In our country where  
353 the number of doctors and other healthcare providers are not sufficient, knowledgeable  
354 university students can be employed to create awareness on COVID-19 among mass people.

## 355 **Acknowledgements**

356 The authors gratefully acknowledge the authority of the selected departments, University of  
357 Rajshahi, Bangladesh for providing information about the students. The authors would also like  
358 to express their sincere gratitude to all the participants for providing their information.

## 359 **References**

360 1. Wuhan Municipal Health and Health Commission's briefing on the current pneumonia

- 361 epidemic situation in our city 2019. Available online:  
362 <http://wjw.wuhan.gov.cn/front/web/showDetail/2019123108989> (accessed on 27 March,  
363 2020).
- 364 2. Naming the coronavirus disease (World Health Organization). Available online:  
365 [https://www.who.int/emergencies/diseases/novel-coronavirus-2019/technical-](https://www.who.int/emergencies/diseases/novel-coronavirus-2019/technical-guidance/naming-the-coronavirusdisease-(covid-2019)-and-the-virus-that-causes-it)  
366 [guidance/naming-the-coronavirusdisease-\(covid-2019\)-and-the-virus-that-causes-it](https://www.who.int/emergencies/diseases/novel-coronavirus-2019/technical-guidance/naming-the-coronavirusdisease-(covid-2019)-and-the-virus-that-causes-it)  
367 (accessed on 27 March, 2020).
- 368 3. Sohrabia C, Alsafib Z, O'Neilla N, Khanb M, Kerwanc A, Al-Jabirc A, Iosifidisa C,  
369 Aghad R. World Health Organization declares global emergency: A review of the 2019  
370 novel coronavirus (COVID-19). *International Journal of Surgery*, 2020; 76:71–76
- 371 4. The Novel Coronavirus Pneumonia Emergency Response Epidemiology Team, Weekly  
372 Surveillance (Chinese Centers for Disease Control and Prevention). Available online:  
373 <http://weekly.chinacdc.cn/en/article/id/e53946e2-c6c4-41e9-9a9b-fea8db1a8f51> (accessed  
374 on 27 March, 2020).
- 375 5. Corona Virus Resource Centre, John Hopkins University and Medicine. Available online:  
376 <https://coronavirus.jhu.edu/map.html> (accessed on April 9, 2020).
- 377 6. M. Bassetti, A. Vena, D. Roberto Giacobbe, The Novel Chinese Coronavirus (2019-  
378 nCoV) Infections: challenges for fighting the storm, *Eur. J. Clin. Invest.* 2020; e13209.  
379 <https://doi.org/10.1111/eci.13209>.
- 380 7. W. Ji, W. Wang, X. Zhao, J. Zai, X. Li, Homologous recombination within the spike  
381 glycoprotein of the newly identified coronavirus may boost cross-species transmission  
382 from snake to human, *J. Med. Virol.* 2020; 92 (4):433–440. [https://doi.](https://doi.org/10.1002/jmv.25682)  
383 [org/10.1002/jmv.25682](https://doi.org/10.1002/jmv.25682).

- 384 8. W.G. Carlos, C.S. Dela Cruz, B. Cao, S. Pasnick, S. Jamil, Novel wuhan (2019-nCoV)  
385 coronavirus, *Am. J. Respir. Crit. Care Med.* 2020; 201 (4):7–8. <https://doi.org/10.1164/rccm.2014P7>.  
386
- 387 9. P. Wu, X. Hao, E.H.Y. Lau, J.Y. Wong, K.S.M. Leung, J.T. Wu, et al., Real-time  
388 tentative assessment of the epidemiological characteristics of novel coronavirus  
389 infections in Wuhan, China, as at 22 January 2020. *Euro Surveill.* 2020; 25.
- 390 10. World Health Organization, Corona Virus. [https://www.who.int/health-](https://www.who.int/health-topics/coronavirus#tab=tab_1)  
391 [topics/coronavirus#tab=tab\\_1](https://www.who.int/health-topics/coronavirus#tab=tab_1) (accessed on 27 March, 2020).
- 392 11. UNICEF. Coronavirus disease (COVID-19): What parents should know. Available  
393 online: [https://www.unicef.org/bangladesh/en/coronavirus-disease-covid-19-what-](https://www.unicef.org/bangladesh/en/coronavirus-disease-covid-19-what-parents-should-know)  
394 [parents-should-know](https://www.unicef.org/bangladesh/en/coronavirus-disease-covid-19-what-parents-should-know).
- 395 12. World Health Organization, Corona Virus Disease (COVID-19) Outbreak. Available  
396 online: [https://www.who.int/southeastasia/outbreaks-and-emergencies/novel-coronavirus-](https://www.who.int/southeastasia/outbreaks-and-emergencies/novel-coronavirus-2019)  
397 [2019](https://www.who.int/southeastasia/outbreaks-and-emergencies/novel-coronavirus-2019) (accessed on April 9, 2020).
- 398 13. Complimentary population monograph of Bangladesh. Bangladesh Bureau of Statistics  
399 (BBS), Dhaka, November 2015. Available online: [http://203.112.218.65:8008/](http://203.112.218.65:8008/WebTestApplication/userfiles/Image/Pop%20Monographs/Volume-7_PD.V.pdf)  
400 [WebTestApplication/ userfiles/Image/ Pop Monographs/Volume-7\\_PD.V.pdf](http://203.112.218.65:8008/WebTestApplication/userfiles/Image/Pop%20Monographs/Volume-7_PD.V.pdf) (Accessed  
401 on April 6, 2020).
- 402 14. Person B, Sy F, Holton K, Govert B, Liang A, Garza B, et al. Fear and Stigma: The  
403 Epidemic within the SARS Outbreak. Vol. 10, *Emerging Infectious Diseases*. Centers for  
404 Disease Control and Prevention (CDC); 2004; 358–63.
- 405 15. Rana M, Sayem A, Karim R, Islam N, Islam R, Zaman TK, Hossain G.  
406 Assessment of knowledge regarding tuberculosis among non-medical university students

407 in Bangladesh: a cross-sectional study. *BMC Public Health*. 2015; 15:716. doi:  
408 10.1186/s12889-015-2071-0.

409 16. Zhong B-L, Luo W, Li H-M, Zhang Q-Q, Liu X-G, Li W-T, et al. Knowledge, attitudes,  
410 and practices towards COVID-19 among Chinese residents during the rapid rise period of  
411 the COVID-19 outbreak: a quick online cross-sectional survey. *Int. J. Biol. Sci.* 2020;  
412 16(10): 1745-1752. doi: 10.7150/ijbs.45221.

413 17. Modi PD, Nair G, Uppe A, Modi J, Tuppekar B, Gharpure AS and Langade D. COVID-19  
414 Awareness among Healthcare Students and Professionals in Mumbai Metropolitan  
415 Region: A Questionnaire Based Survey. *Cureus*, 2020; 12(4): e7514.

416
